# Supplementary material for: Evidence of protein-free homology recognition in magnetic bead force–extension experiments
Source: PubMed Central journal article supplement (PMC4971244; doi:10.1098/rspa.2016.0186), 2016-07
Supplement: rspa20160186supp1.pdf [file rspa20160186supp1.pdf]

# Supporting Material

## S.1. Additional experimental data

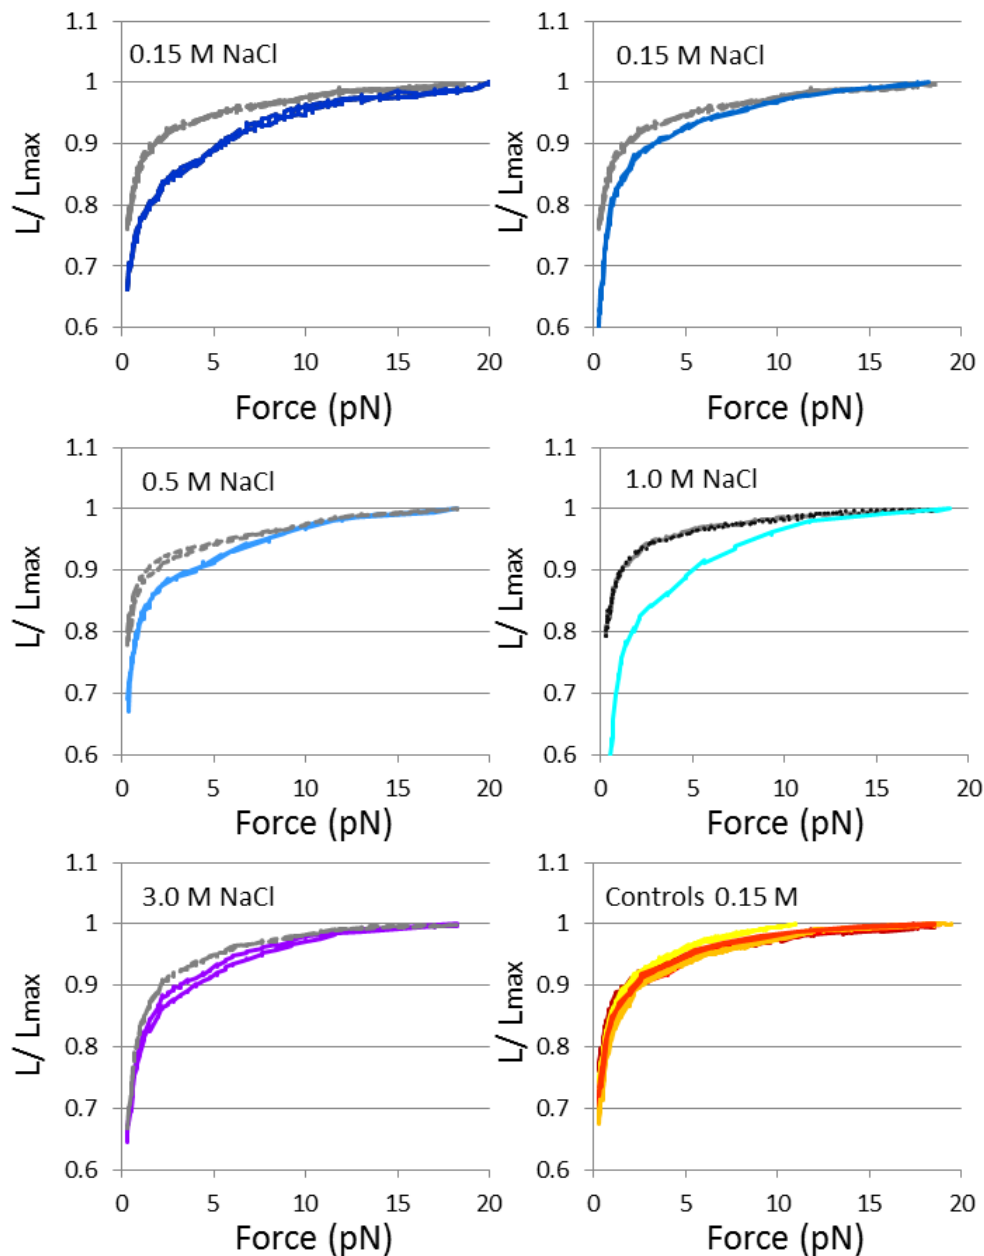

**Fig. S.1. Additional representative results showing the extension vs. force curves** (increasing and decreasing force) in 0.15, 0.5, 1.0, and 3 M NaCl and 50 mM phosphate buffer at 24°C for a dsDNA construct (coloured curves) and a control curve for dsDNA without homologous regions in the corresponding ionic conditions (dashed gray with an additional black points for a second control experiment). Five control curves obtained with different beads at 24°C and phosphate buffer- 0.15 M NaCl are shown in yellow, orange, light red, red, and dark red (bottom right).

First, we present unprocessed experimental data (at 24°C) for other experimental runs in addition to what is shown in Fig.1 of the main text. In the top two panels we present the results of two separate controls and construct experiments done at the same conditions. We see that the difference between the construct and control experiments is present in both experiments. Though, its magnitude varies somewhat, leading to a large uncertainty in the fitting parameters as seen below.

We also show that this difference persists with changing salt concentrations between 0.15 M and 3M. Last of all, we show that the variation in the curves of multiple control experiments is much smaller than the differences seen between construct and control curves at a given salt concentration. This is first seen by looking at the middle right panel where we plot two control curves against one construct; clearly the biggest difference is between the construct and the two controls that lie close to each other.

Furthermore, we show in the bottom right hand panel the curves of multiple control experiments for 0.15 M NaCl, again the difference is much smaller than observed differences between constructs and controls.

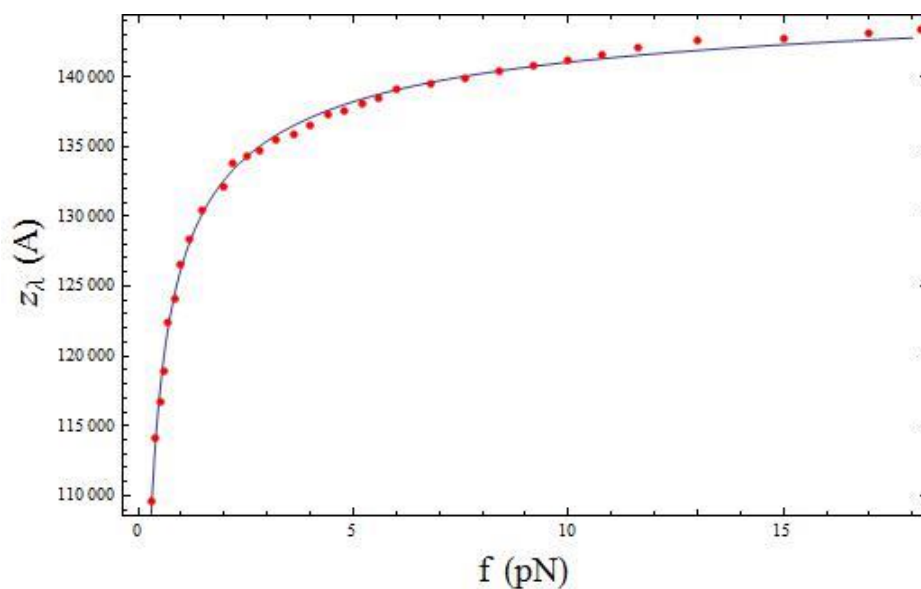

**Fig. S.2. WLC fit to the control experiment.** In this figure we show a fit to the data for the control DNA in 0.15M NaCl aqueous solution to the worm like chain extension formula. Using Eq. (3) of the main text with  $L_{loop} = 0$ , the fitted value of bending persistence length is  $l_p = 636.57 \text{ \AA}$ .

In Fig. S.2 we show a typical fit of the bending persistence length to control experimental data. Fits were done on control experiment runs and those values were used in fitting  $\Delta z$ . Though the fit is quite good, the value of  $l_p = 636.57 \text{ \AA}$  should really be considered as an apparent value bending persistence length as its value is larger than the commonly accepted value of  $l_p \approx 500 \text{ \AA}$ . This value is due to the fit being performed at relatively large values of the pulling force. In fact, there is quite a large spread of values in  $l_p$  about  $l_p \approx 500 \text{ \AA}$ , when we fitted them to available experimental data.

This is because the uncertainty in the extension (for repeated runs) for larger force values affects  $l_p$  more than extensions at lower forces, due to the non-linear nature of the extension formula. A fit containing more low force values would likely give a range of values closer to  $500 \text{ \AA}$ . Importantly, we demonstrate that difference between construct and control lies outside this uncertainty in extension values (see Fig S.1).

Fitting extension curves over the range of force values considered reflects, however, better the true nature of these curves and the uncertainty in extension values. One could introduce DNA extensibility into the wormlike chain formula, which would be a small correction at these force values, but this seems rather pointless as the fits to the control curves are adequate.

## S.2. Model 1: formulating the non-linear term

We will use polymer scaling arguments to deduce what the form of the non-linear term in the free energy of the loop, supposing that a non-linear term comes from different parts of the loop interacting in an attractive manner. We may write down for the average interaction attractive energy

$$E_{\text{int}} = - \iint_{\Gamma} d\mathbf{r} d\mathbf{r}' \rho(\mathbf{r}) V(\mathbf{r} - \mathbf{r}') \rho(\mathbf{r}'). \quad (\text{S.1})$$

Here,  $\rho(\mathbf{r})$  is the local looped DNA density at position  $\mathbf{r}$  and  $-V(\mathbf{r} - \mathbf{r}')$  is an attractive interaction energy between two parts of the loop at positions  $\mathbf{r}$  and  $\mathbf{r}'$ . Both volume integrals are taken over average volume of space,  $\Gamma$ , that the loop occupies. If we suppose that the interaction is short ranged such that  $V(\mathbf{r} - \mathbf{r}') \approx V_0 \delta(\mathbf{r} - \mathbf{r}')$  and we assume the density  $\rho(\mathbf{r})$  to be uniform in the volume taken up by the loop, i.e.  $\rho(\mathbf{r}) = \bar{\rho}$ , then

$$E_{\text{int}} \approx -\bar{\rho}^2 V_0 \Gamma. \quad (\text{S.2})$$

Now since the density should go as  $\rho \propto L_{\text{loop}} / \Gamma$  we have that

$$E_{\text{int}} \sim L_{\text{loop}}^2 \Gamma^{-1}. \quad (\text{S.3})$$

We now use polymer scaling arguments to deduce the dependence of  $E_{\text{int}}$  on  $L_{\text{loop}}$ .

Supposing that volume taken up by the loop goes as  $\Gamma \sim R_g^3 \sim L_{\text{loop}}^{3\nu}$ , so that we have

$$E_{\text{int}} \sim L_{\text{loop}}^{2-3\nu}. \quad (\text{S.4})$$

We will choose the value  $\nu = 1/2$ . We cannot assert that this value is exact; as for excluded volume polymer it is known to be close to  $3/5$  in the absence of sufficiently strong attraction between the polymer segments [M.Do, *Introduction to polymer physics*, Clarendon Press, Oxford, 1996]. In our rather complex system there may well be a balance of the attractions between different parts of the loop and electrostatic repulsions, allowing for a lower value of  $\nu$ . For simple estimates we take the

value of  $\nu$  of a simple random walk, thus behaving as a polymer in a ' $\theta$ -solvent', which fits the experimental data well. Thus when the loop is large we suggest the form

$$E_{\text{int}} = -aL_{\text{loop}}^{1/2}. \quad (\text{S.5})$$

An additional factor  $\exp(-b/L_{\text{loop}})$  is introduced to take account of the bending free energy cost to form a loop that hinders these interactions. This yields the form for  $F_{\text{loop}}$  presented in Eq. (4) of the main text.

### S.3. Equations for the length of the loop

For Model 1, the length of the loop, obtained by numerical minimization of Eq. (4) of the main text, can be well approximated by

$$L_{\text{loop}} = \left( \frac{a}{\varepsilon_{\text{loop}} - 2g_{\text{WLC}}(f)} \right)^2 H \left( \left( \frac{\varepsilon_{\text{loop}} - 2g_{\text{WLC}}(f)}{a} \right)^2 b \right), \quad (\text{S.6})$$

where

$$H(\tilde{b}) = (0.249 + 1.85\tilde{b} - 12.50\tilde{b}^2 + 46.35\tilde{b}^3 - 76.82\tilde{b}^4) \theta(0.315 - \tilde{b}). \quad (\text{S.7})$$

The value of the argument of the function  $H$ ,  $\tilde{b} = (\varepsilon_{\text{loop}} - 2g_{\text{WLC}}(f))^2 b / a^2$ , increases as one increases both  $b$  and the pulling force  $f$ . One should note that when  $\tilde{b}$  exceeds the value 0.315 the  $L_{\text{loop}} \neq 0$  state is no longer stable, the only stable one is then the  $L_{\text{loop}} = 0$  state. Thus, we have allowed for the  $L_{\text{loop}} \neq 0$  state to be metastable. The latter assumes that the energy barrier is sufficiently large for the molecule complete unfolding of the loop, i.e. emergence of the  $L_{\text{loop}} = 0$  state. Hence, thermal fluctuations are not expected to cause a significant unfolding. We plot this function and the resulting expression for  $z$  in Fig.2 and use it to fit the experimental data shown in Fig. 5 (both in the main text), with the additional constraint that the maximum value of  $L_{\text{loop}}$  is  $L_{\text{max}} = 34000\text{\AA}$ .

For Model 2 the minimization is simple and we obtain

$$L_{\text{loop}} = L_0 + \beta g_{\text{wlc}}(f), \quad (\text{S.8})$$

with the requirement that  $L_{\text{max}} \geq L_{\text{loop}} \geq 0$  We plot this function (and the resulting expression for  $z$ ) in Fig.3 and use it to fit experimental data in Fig 6 of the main text.

## S.4. Additional parameter plots for Model 1

Here, we show additional plots for the readers to get a better feeling of how Model 1 works. In Fig. S.3 we plot the  $L_{loop}$  depending part of the total free energy,  $F_{loop}(L_{loop}) - 2g_{wlc}(f)L_{loop}$ , vs  $L_{loop}$ . We see that decreasing  $a$ , as well as increasing either  $\varepsilon = \varepsilon_{loop} - 2g_{wlc}(f)$  or  $b$  destabilizes the free energy minimum at  $L_{loop} \neq 0$ .

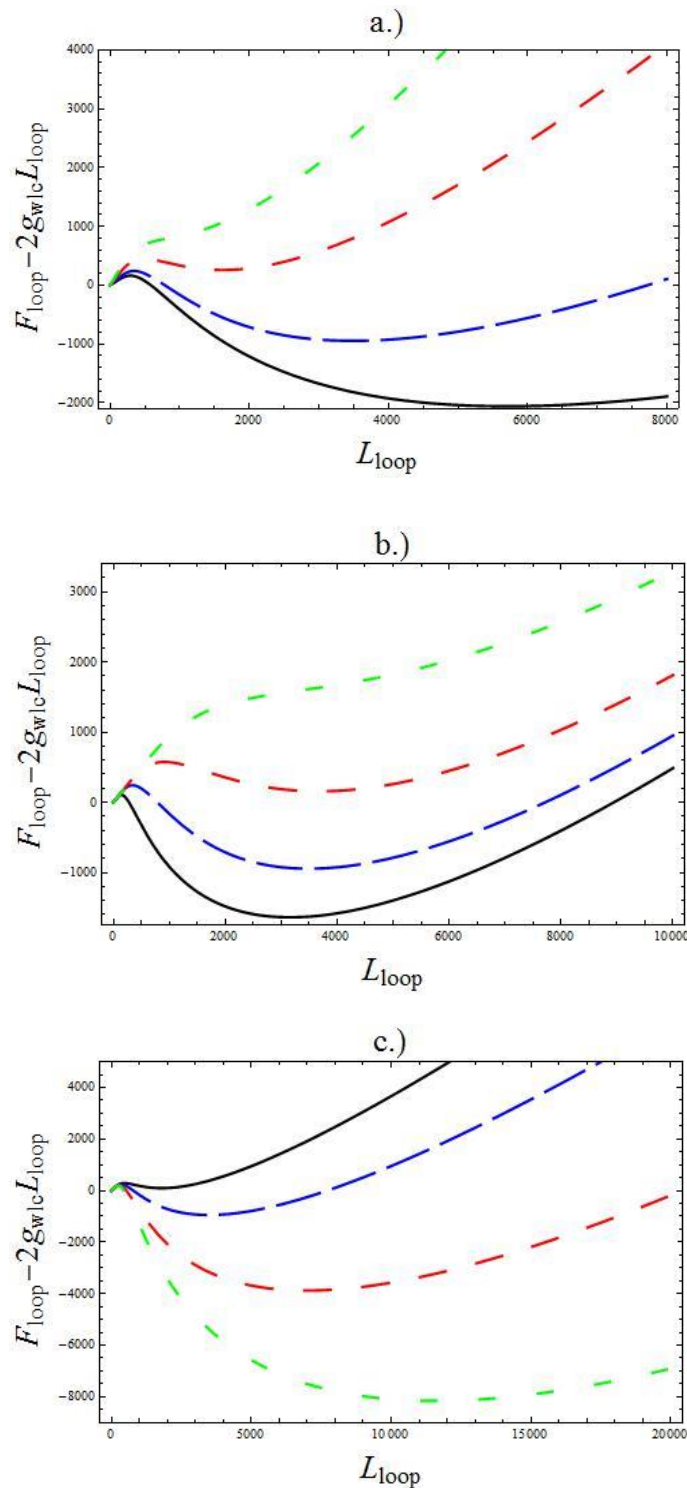

**Fig. S.3. Plots of the free energy contribution  $F_{loop}(L_{loop}) - 2g_{wlc}(f)L_{loop}$  for various values of the parameters  $a, b$  and  $\varepsilon = \varepsilon_{loop} - 2g_{wlc}(f)$ .**

a.) We fix  $b = 1000 \text{ \AA}$  and  $a = 100 k_B T / \text{ \AA}^{1/2}$ . The thick solid (black), long dashed (blue), medium dashed (red), and short dashed (green) lines correspond, respectively, to the values  $\varepsilon = 0.75, 1, 1.5, 2 k_B T / \text{ \AA}$

b.) We fix  $a = 100 k_B T / \text{ \AA}^{1/2}$  and  $\varepsilon = 1 k_B T / \text{ \AA}$ . The thick solid (black), long dashed (blue), medium dashed (red), and short dashed (green) lines correspond to the values  $b = 500, 1000, 2000, 4000 k_B T / \text{ \AA}$

c.) We fix  $b = 1000 \text{ \AA}$  and  $\varepsilon = 1 k_B T / \text{ \AA}$ . The thick solid (black), long dashed (blue), medium dashed (red), and short dashed (green) lines correspond to the values  $a = 70, 100, 150, 200 k_B T / \text{ \AA}^{1/2}$ .

In Fig S.4 we show the effect of changing  $b$  on the value of  $L_{loop} / L_{max}$ . Here we see that the shape of the continuous part of the curves where  $L_{loop} \neq 0$  is not affected much by changing  $b$ , but increasing  $b$  reduces the force at which we see a sudden jump down to  $L_{loop} = 0$ , as well as the magnitude of that jump.

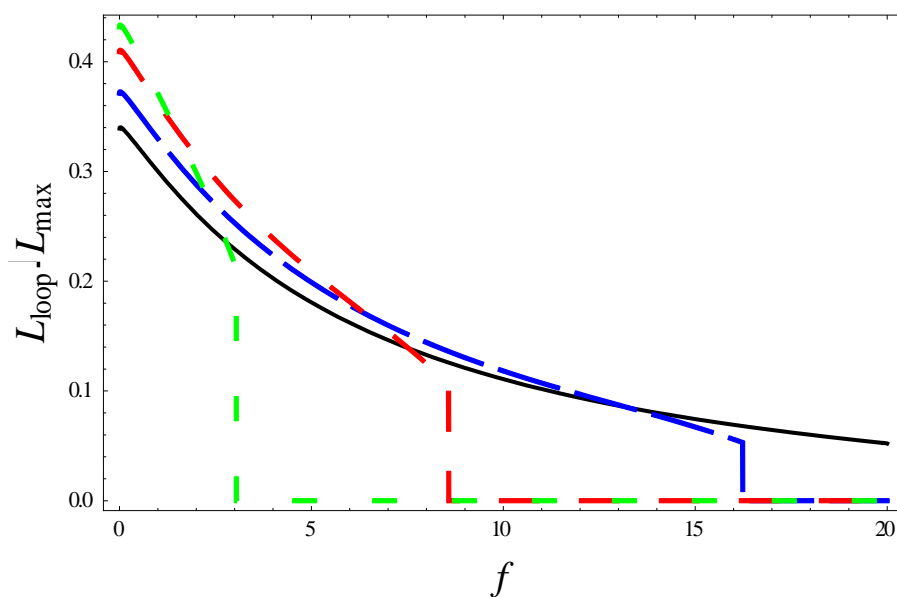

**Fig. S.4. The ratio of loop length to maximal extension as a function of the pulling force: the effect of Kuhn length.** Here we fix  $\varepsilon_{loop} = 0.5k_b T / \text{\AA}$  and  $a = 100k_b T / \text{\AA}^{1/2}$ , and plot curves for different values of Kuhn length:  $b = 1000 \text{\AA}$  (black solid line),  $b = 2000 \text{\AA}$  (blue long dashed line),  $b = 4000 \text{\AA}$  (red medium dashed line) and  $b = 8000 \text{\AA}$  (green short dashed line).

## S.5. Model parameter fit values

Here, we present values for model parameters fitted to various experimental runs. Shown in Fig. S.5 and Fig. S.6 are the fitted values of Model 1 and 2, respectively, to the available experimental data. The fitted values, averaged over experimental runs done at the same conditions, are also presented in Tables S.1 and S.2. Some of the data seem to indicate that the degree of pairing first increases with salt concentration, before reducing. However, the data of multiple experimental runs have large scatter; the uncertainty on the fitted values is large, so the existence of this trend remains uncertain.

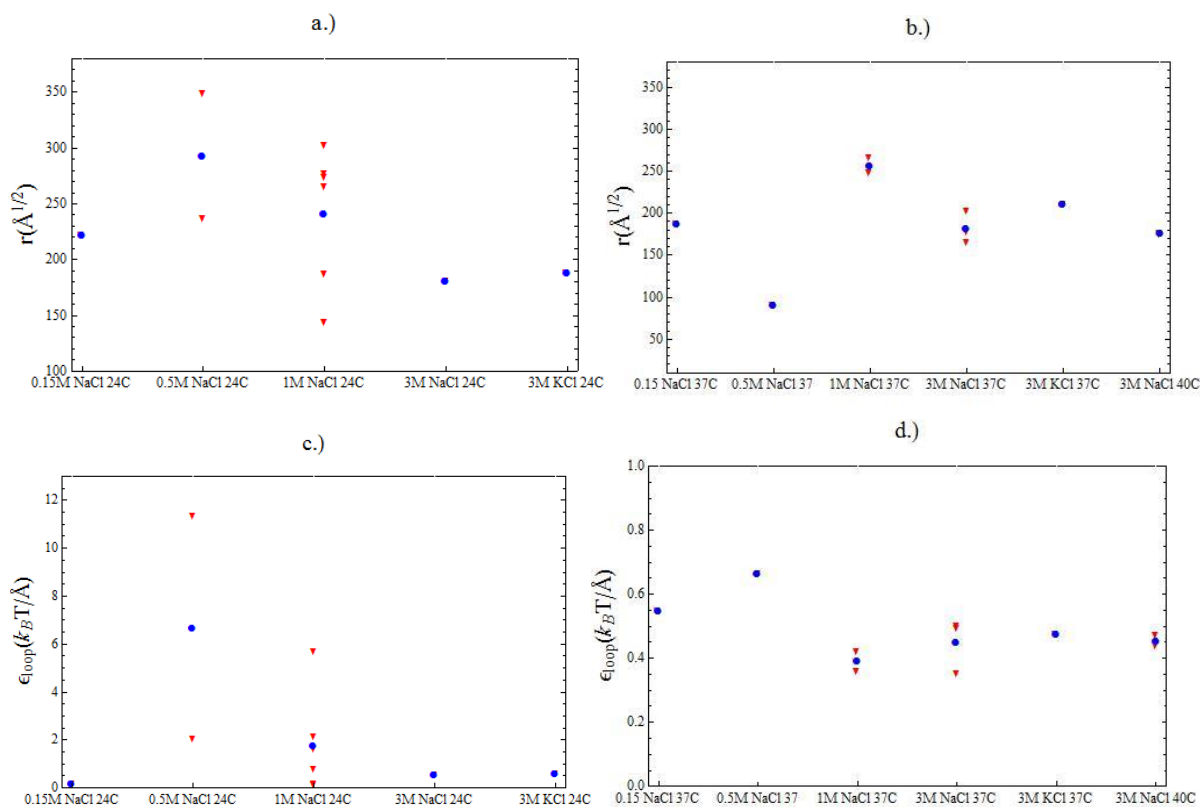

**Fig S.5. The fitted parameter values of Model 1,  $r$  ( $= a / \epsilon_{loop}$ ) and  $\epsilon_{loop}$ , for different temperatures and ionic conditions. Panels a.) and b.) show the fitted values for the ratio  $r$ , while c.) and d.) display the values of  $\epsilon_{loop}$ . As indicated in the labels on the x-axis, a.) and c.) correspond to data at the lower temperature value 24° C, while b.) and d.) correspond to the higher temperature values of 37° C and 40° C. The red triangles correspond to individual experimental runs, whereas the blue circles correspond to the averaged values.**

| Temperature | Ionic conditions | Mean Fitted values of $r = a / \epsilon_{loop}$ | Mean Fitted values of $\epsilon_{loop}$ |
|-------------|------------------|-------------------------------------------------|-----------------------------------------|
| 24°C        | 0.15M NaCl       | 222 $\text{\AA}^{1/2}$                          | 0.167 $k_B T/\text{\AA}$                |
| 24°C        | 0.5M NaCl        | 293 $\text{\AA}^{1/2}$                          | 6.68 $k_B T/\text{\AA}$                 |
| 24°C        | 1M NaCl          | 241 $\text{\AA}^{1/2}$                          | 1.75 $k_B T/\text{\AA}$                 |
| 24°C        | 3M NaCl          | 181 $\text{\AA}^{1/2}$                          | 0.547 $k_B T/\text{\AA}$                |
| 24°C        | 3M KCl           | 188 $\text{\AA}^{1/2}$                          | 0.571 $k_B T/\text{\AA}$                |
| 37°C        | 0.15M NaCl       | 187 $\text{\AA}^{1/2}$                          | 0.547 $k_B T/\text{\AA}$                |
| 37°C        | 0.5M NaCl        | 90.6 $\text{\AA}^{1/2}$                         | 0.664 $k_B T/\text{\AA}$                |
| 37°C        | 1M NaCl          | 256 $\text{\AA}^{1/2}$                          | 0.390 $k_B T/\text{\AA}$                |
| 37°C        | 3M NaCl          | 182 $\text{\AA}^{1/2}$                          | 0.450 $k_B T/\text{\AA}$                |
| 37°C        | 3M KCl           | 210 $\text{\AA}^{1/2}$                          | 0.476 $k_B T/\text{\AA}$                |
| 40°C        | 3M NaCl          | 176 $\text{\AA}^{1/2}$                          | 0.454 $k_B T/\text{\AA}$                |

**Table S.1. The average values of the fitted parameters of Model 1,  $r = a / \epsilon_{loop}$  and  $\epsilon_{loop}$  for the various ionic conditions and temperatures probed in the pulling experiments.**

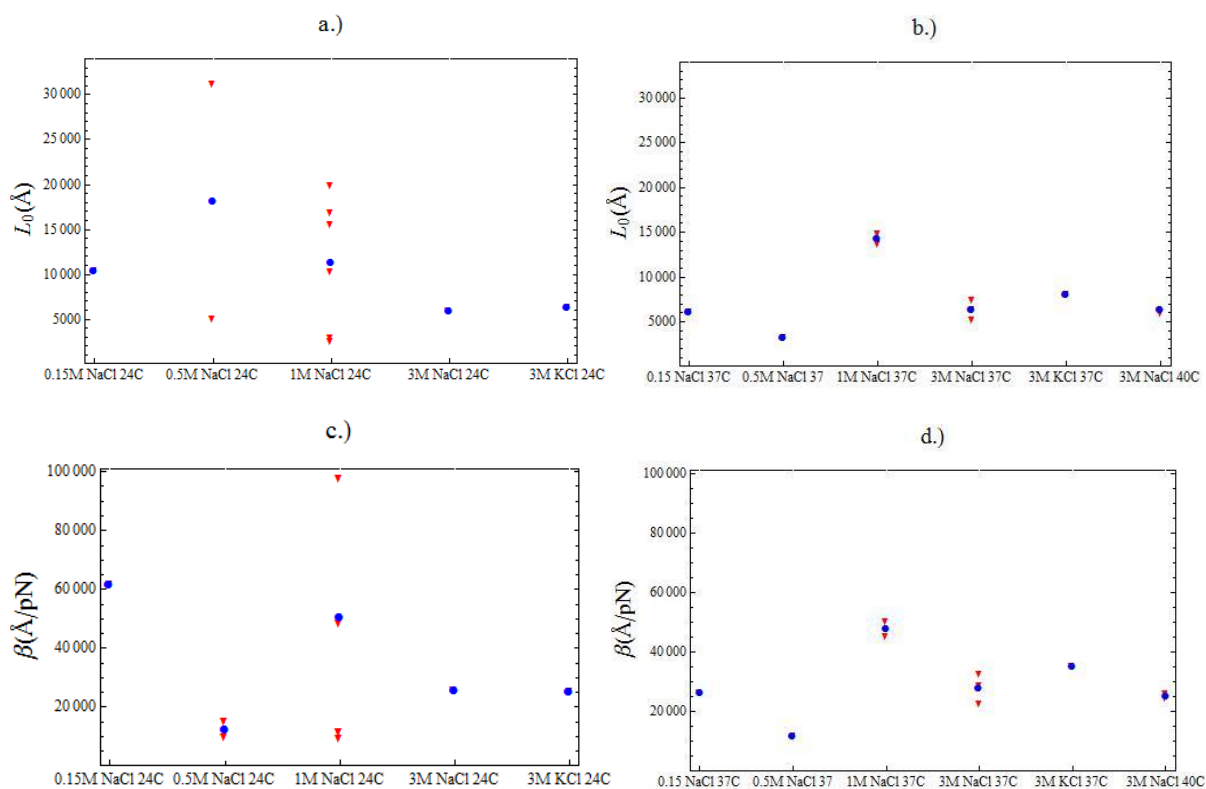

**Fig. S.6. The fitted parameter values of Model 2,  $L_0$  and  $\beta$ , for different temperatures and ionic conditions.** The fitted values for  $L_0$  are presented in a.) and b.) while c.) and d.) display the values of  $\beta$ . As indicated in the labels on the x-axis, a.) and c.) correspond to data at the lower temperature value 24° C, while b.) and d.) correspond to the higher temperature values of 37° C and 40° C. The red triangles correspond to individual experimental runs, whereas the blue circles correspond to the averaged values.

| Temperature | Ionic conditions | Mean Fitted values of $L_0$ | Mean Fitted values of $\beta$ |
|-------------|------------------|-----------------------------|-------------------------------|
| 24°C        | 0.15M NaCl       | 10500Å                      | 61600 Å/pN                    |
| 24°C        | 0.5M NaCl        | 18100Å                      | 12300 Å/pN                    |
| 24°C        | 1M NaCl          | 11300Å                      | 50600 Å/pN                    |
| 24°C        | 3M NaCl          | 5880Å                       | 25500 Å/pN                    |
| 24°C        | 3M KCl           | 6790Å                       | 23400 Å/pN                    |
| 37°C        | 0.15M NaCl       | 6090Å                       | 26200 Å/pN                    |
| 37°C        | 0.5M NaCl        | 3200Å                       | 11600 Å/pN                    |
| 37°C        | 1M NaCl          | 14800Å                      | 47700 Å/pN                    |
| 37°C        | 3M NaCl          | 6340Å                       | 27900 Å/pN                    |
| 37°C        | 3M KCl           | 8010Å                       | 35100 Å/pN                    |
| 40°C        | 3M NaCl          | 6340Å                       | 25200 Å/pN                    |

**Table S.2. The average values of the fitted parameters of Model 2,  $L_0$  and  $\beta$ , for the various ionic conditions and temperatures probed in the pulling experiments.**



## S.5. The DNA coding of the homologous segments in the construct DNA

The construct molecules were made by adding an additional DNA segment to the Lambda DNA. This segment was made by PCR reaction amplifying between positions 16322 and 26598 on lambda DNA. The segment was attached so that base pair text (the Lambda DNA base pair sequence from positions 16322 to 26598) ran in the opposite direction to that of the Lambda DNA. The sequence between positions 16322 and 26598 reads as:

```
16322 cctggtgtc tgtgggatat gctgacccat ccgcgctacg gcatggggaa acgtcttggg
16381 gcggcggatg tggataaatg ggcgctgtat gtcacatcgcc agtactgcca ccagtcagtg
16441 ccggacggct ttggcggcac ggagccgcgc atcacctgta atgcgtacct gaccacacag
16501 cgtaaggcgt gggatgtgct cagcgatttc tgctcggcga tgcgctgtat gccggtatgg
16561 aacgggcaga cgctgacggt cgtgcaggac cgaccgtcgg ataagacgtg gacctataac
16621 cgcagtaatg tggatgatgcc ggatgatggc gcgccgttcc gctacagctt cagcgccttg
16681 aaggaccgcc ataatgccgt tgaggtgaac tggattgacc cgaacaacgg ctgggagacg
16741 gcgacagagc ttgttgaaga tacgcaggcc attgcccggt acggtcgtaa tgttacgaag
16801 atggatgcct ttggctgtac cagccggggg caggcacacc gcgccgggct gtggctgatt
16861 aaaacagaac tgctggaaac gcagaccgtg gatttcagcg tcggcgccaga agggcttcgc
16921 catgtaccgg gcgatgttat tgaaatctgc gatgatgact atgccggtat cagcaccggt
16981 ggtcgtgtgc tggcggtgaa cagccagacc cggacgctga cgctcgaccg tgaatcacag
17041 ctgccatcct ccggtaccgc gctgataaag ctggttgacc gaagtggcaa tccggtcagc
17101 gtggagggttc agtccgctac cgacggcgtg aaggtaaaaag tgagccgtgt tctgacgggt
17161 gttgctgaat acagcgtatg ggagctgaag ctgccgacgc tgcgccagcg actgttccgc
17221 tgcgtgagta tccgtgagaa cgacgcagcc acgtatgcca tcaccgccgt gcagcatgtg
17281 ccgaaaaaag aggccatcgt ggataacggg gcgcactttg acggcgaaca gagtggcacg
17341 gtgaatggtg tcacgcccgc agcgggtgac cacctgaccg cagaagtcac tgcagacagc
17401 ggggaatata aggtgctggc gcgatgggac acaccgaagg tggtaaggg cgtgagttc
17461 ctgctccgtc tgaccgtaac agcggagcag ggcagtgagc ggtggtcag cagggcccgg
17521 acgacggaaa ccacataccg cttcacgcaa ctggcgctgg ggaactacag gctgacagtc
17581 cgggcggtaa atgcgtgggg gcagcagggc gatccggcgt cggtatcgtt ccggattgcc
17641 gcaccggcag caccgtcgag gattgagctg acgccgggct attttcagat aaccgccacg
17701 ccgcatcttg ccgtttatga cccgacggta cagtttgagt tctggttctc ggaaaagcag
17761 attgcggata tcagacaggt tgaaaccagc acgcgttatc ttggtacggc gctgtactgg
17821 atagccgcca gtatcaatat caaacggggc catgattatt acttttatac ccgcagtgtg
17881 aacaccggtg gcaaatcggc attcgtggag gccgtcggtc gggcgagcga tgatgcggaa
17941 ggttacctgg attttttcaa aggcaagata accgaatccc atctcggcaa ggagctgctg
18001 gaaaaagtcg agctgacgga ggataacgcc agcagactgg aggagttttc gaaagagtgg
18061 aaggatgcca gtgataagtg gaatgccatg tgggctgtca aaattgagca gaccaaaagc
18121 ggcaaacatt atgtcgcggg tattggcctc agcatggagg acacggagga aggcaaactg
18181 agccagtttc tggttgccgc caatcgtatc gcatttattg acccggcaaa cgggaatgaa
18241 acgccgatgt ttgtggcgca gggcaaccag atattcatga acgacgtgtt cctgaagcgc
18301 ctgacggccc ccaccattac cagcggcggc aatcctccgg cttttccct gacaccggac
18361 ggaaagctga ccgctaaaaa tgcggatatac agtggcagtg tgaatgcgaa ctccgggacg
18421 ctcagtaatg tgacgatagc tgaaaactgt acgataaacg gtacgctgag ggcgaaaaaa
18481 atcgtcgggg acattgtaaa ggcggcgagc gcggcttttc cgcgccagcg tgaagcagc
18541 gtggactggc cgctcaggtac ccgtactgtc accgtgaccg atgaccatcc ttttgatcgc
18601 cagatagtgg tgcttccgct gacgtttcgc ggaagtaagc gtactgtcag cggcaggaca
18661 acgtattcga tgtgttatct gaaagtactg atgaaacggc cggtgattta tgatggcgcg
18721 gcgaacgagg cggtacaggt gttctcccgt attgttgaca tgccagcggg tcggggaaac
18781 gtgatcctga cgttcacgct tacgtccaca cggcattcgg cagatattcc gccgtatacg
18841 tttgccagcg atgtgcaggt tatgggtgatt aagaaacagg cgctgggcat cagcgtggtc
18901 tgagtgtgtt acagaggttc gtccgggaac gggcgtttta ttataaaaca gtgagaggtg
18961 aacgatgcgt aatgtgtgta ttgccgttgc tgtctttgcc gcactgcggt tgacagtcac
19021 tccggcccgt gcggaagggt gacatgggtac gtttacgggt ggctattttc aagtgaacc
19081 gggtagattg ccgtcgttgt cgggcgggga taccgggtgt agtcatctga aagggattaa
19141 cgtgaagtac cgttatgagc tgacggacag tgtgggggtg atggcttccc tggggttcgc
19201 cgcgtcgaaa aagagcagca cagtgatgac cggggaggat acgtttcact atgagagcct
19261 gcgtggacgt tatgtgagcg tgatggccgg accggtttta caaatcagta agcaggtcag
19321 tgcgtacgcc atggccggag tggctcacag tcggtgttcc ggcagtaaa tggattaccg
```

19381 taagacggaa atcactcccg ggtatatgaa agagacgacc actgccaggg acgaaagtgc  
19441 aatgcggcat acctcagtgg cgtggagtgc aggtatacag attaatccgg cagcgtccgt  
19501 cgttgttgat attgcttatg aaggctccgg cagtggcgac tggcgactg acggattcat  
19561 cgttggggtc ggttataaat tctgattagc caggtaacac agtgttatga cagcccggc  
19621 gaaccggtgg gcttttttgt ggggtgaata tggcagtaaa gatttcagga gtcctgaaag  
19681 acggcacagg aaaaccggta cagaactgca ccatcagct gaaagccaga cgtaacagca  
19741 ccacggtggg ggtgaacacg gtgggctcag agaatccgga tgaagccggg cgttacagca  
19801 tggatgtgga gtacggctcag tacagtgtca tctcgcaggt tgacggtttt ccaccatcgc  
19861 acgccgggac catcacctgt tatgaagatt cacaaccggg gacgctgaat gattttctct  
19921 gtgccatgac ggaggatgat gcccgccgg aggtgctgcg tctgtctgaa ctgatgggtg  
19981 aagaggtggc gcgtaacgcg tccgtgggtg cacagagtac ggagacgcg aagaaatcag  
20041 ccggcgatgc cagtgcacga gctgctcagg tccgcccct tctgactgat gcaactgact  
20101 cagcacgcgc cgccagcacg tccgcccgg aggctgcac gtcagctcag gaagcgtcct  
20161 ccggcgagca agcggcatca gcaaaggcca ctgaagcggg aaaaagtgcc gcagccgcag  
20221 agtcctcaaa aaacgcggcg gccaccagtg ccggtgcggc gaaaacgtca gaaacgaatg  
20281 ctgcagcgtc acaacaatca gccgccacgt ctgcctccac cgcggccacg aaagcgtcag  
20341 aggccgccac ttcagcacga gatgcggtgg cctcaaaaaga ggagcaaaa tcatcagaaa  
20401 cgaacgcac atcaagtgcc ggtcgtgcag cttcctcggc aacggcggca gaaaattctg  
20461 ccagggcggc aaaaacgtcc gagacgaatg ccaggtcatc tgaacagca gcggaacgga  
20521 gcgcctctgc cgcggcagac gcaaaaacag cggcggcggg gactgctgca acggcatcca  
20581 cgaagggcgc agaggctgcg ggaagtgcgg tatcagcatc gcagagcaaa agtgccgag  
20641 aagcggcggc aatacgtgca aaaaattcgg caaacgtgc agaagatata gcttcagctg  
20701 tccgcttga ggatgcggac acaacgagaa aggggatagt gcagctcagc agtgcaacca  
20761 acagcacgtc tgaaacgctt gctgcaacgc caaaggcggg taaggtggtg atggatgaaa  
20821 cgaacagaaa agcccactgg acagtccggc actgaccgga acgccaacag caccaaccgc  
20881 gctcagggga acaacaata cccagattgc gaacaccgct tttgtactgg ccgcgattgc  
20941 agatgttatc gacgcgtcac ctgacgcact gaatacgtg aatgaactgg ccgcagcgt  
21001 cgggaatgat ccagattttg ctaccaccat gactaacgcg cttgcgggta aacaaccgaa  
21061 gaatgagaca ctgacggcgc tggcagggct ttccacggcg aaaaaataa taccgtattt  
21121 tccggaaaat gatgcccca gctgactga actgactcag gttggcagg atattctggc  
21181 aaaaaattcc gttgcagatg ttcttgaata ccttggggcc ggtgagaatt cggcctttcc  
21241 ggcaggtgcg ccgatcccgt ggccatcaga tatcgttccg tctggctacg tctgatgca  
21301 ggggcaggcg tttgacaaat cagcctacc aaaacttgc gtccggtatc catcgggtgt  
21361 gcttctgat atgcgaggct ggacaatcaa ggggaaacc gccagcggtc gtgctgtatt  
21421 gtctcaggaa caggatggaa ttaagtgc caacccacag gccagtgcat ccggtacgga  
21481 tttggggacg aaaaccacat cgtcgtttga ttacgggacg aaaaacacag gcagttcga  
21541 ttacggcacc aaatcgacga ataacacggg ggctcatgct cacagtctga gcggttcaac  
21601 aggggccgcg ggtgctcatg cccacacaag tggtttaagg atgaacagtt ctggctggag  
21661 tcagtatgga acagcaacca ttacaggaag tttatccaca gttaaaggaa ccagcacaca  
21721 gggatattgct tatttatcga aaacggacag tcagggcagc cacagtcact cattgtccgg  
21781 tacagccgtg agtgccgggtg cacatgcgca tacagttggt attggtgcg accagcatcc  
21841 ggttgttatc ggtgctcatg cccattctt cagtattggt tcacacggac acaccatcac  
21901 cgttaacgct gcgggtaacg cggaaaacac cgtcaaaaac attgcattta actatattgt  
21961 gaggcttgca taatggcatt cagaatgagt gaacaaccac ggaccataaa aatttataat  
22021 ctgctggccg gaactaatga atttattggt gaaggtgacg catatattcc gcctcatacc  
22081 ggtctgcctg caaacagtac cgatattgca ccgccaagata ttccggctgg cttgtggct  
22141 gttttcaaca gtgatgaggc atcgtggcat ctggtgaa accatcgggg taaaaccgct  
22201 tatgacgtgg cttccggcga cgcgttattt atttctgaac tccgtccgtt accgaaaaat  
22261 tttacctggg tatcgcgggg aggggaatat cagaagtgga acggcacagc ctgggtgaa  
22321 gatacgggag cagaaaaact gttccggatc cgggaggcgg aagaaacaaa aaaaagcctg  
22381 atgcaggtag ccagtgagca tattgcggcg cttcaggatg ctgcagatct ggaaattgca  
22441 acgaagggag aaacctcgtt gctggaagcc tggagaagt atcgggtggt gctgaaccgt  
22501 gttgatacat caactgcacc tgatattgag tggcctgctg tccctgttat ggagtaacg  
22561 tttgtgata tgccgcagaa acgttgatg aaataacgtt ctgcggttag ttagtatatt  
22621 gtaaagctga gtattggttt atttggcgat tattatctt aggagaataa tggagttct  
22681 atgactcaat tgttcatagt gtttacatca ccgccaattg ctttaagac tgaacgcag  
22741 aatatgggtt tttcgtcatg ttttgagtct gctgttgata tttctaaagt cggtttttt  
22801 tcttcgtttt ctctaactat tttccatgaa atacattttt gattattatt tgaatcaatt  
22861 ccaattacct gaagtctttc atctataatt ggcattgtat gtattggttt attggagtag  
22921 atgcttgctt ttctgagcca tagctctgat atccaaatga agccataggc atttgttatt  
22981 ttggctctgt cagctgcata acgcaaaaa atatatattat ctgcttgatc ttcaaatggt

23041 gtattgatta aatcaattgg atggaattgt ttatcataaa aaattaatgt ttgaatgtga  
23101 taaccgtcct ttaaaaaagt cgtttctgca agcttggctg tatagtcaac taactcttct  
23161 gtcgaagtga tatttttagg cttatctacc agtttttagac gctctttaat atcttcagga  
23221 attattttat tgtcatattg tatcatgcta aatgacaatt tgcttatgga gtaatctttt  
23281 aattttaaat aagttattct cctggcttca tcaataaaag agtcgaatga tgttggcgaa  
23341 atcacatcgt cacccattgg attgtttatt tgtatgcaa gagagttaca gcagttatac  
23401 attctgccat agattatagc taaggcatgt aataattcgt aatcttttag cgtattagcg  
23461 acccatcgtc tttctgattt aataatagat gattcagtta aatatgaagg taatttcttt  
23521 tgtgcaagtc tgactaactt ttttatacca atgtttaaca tactttcatt tgaataaac  
23581 tcaatgtcat tttcttcaat gtaagatgaa ataagagtag cttttgctc gctatacatt  
23641 tctaaatcgc cttgtttttc tatcgtattg cgagaatttt tagcccaagc cattaatgga  
23701 tcatttttcc atttttcaat aacattattg ttataccaaa tgcataatcc tataatctgg  
23761 tttttgtttt tttgaataat aaatgttact gttcttgctg tttggaggaa ttgattcaaa  
23821 ttcaagcgaa ataattcagg gtcaaaaatat gtatcaatgc agcatttgag caagtgcgat  
23881 aatcttttaa gtcttctttc ccatggtttt ttagtcataa aactctccat tttgataggt  
23941 tgcattgctag atgctgatat attttagagg tgataaaatt aactgcttaa ctgtcaatgt  
24001 aatacaagtt gtttgatctt tgcaatgatt cttatcagaa accatatagt aaattagtta  
24061 cacaggaaat ttttaataat attattatca ttcattatgt attaaaatta gagttgtggc  
24121 ttggctctgc taacacgttg ctcataggag atatggtaga gccgcagaca cgtcgtatgc  
24181 aggaacgtgc tgcggctggc tgggtgaactt ccgatagtc ggggtgtgaa tgattccag  
24241 ttgctaccga ttttaccatat tttttgcatg agagaatttg taccacctcc caccgacct  
24301 ctatgactgt acgccactgt ccctaggact gctatgtgcc ggagcggaca ttacaaact  
24361 ccttctcggg gcatgccact gttgccaatg acctgcctag gaattgggta gcaagttact  
24421 accggatfff gtaaaaacag ccctcctcat ataaaaagta ttcgttcact tccgataagc  
24481 gtcgtaatff tctatctttc atcatattct agatccctct gaaaaaatct tccgagtttg  
24541 ctaggcactg atacataact cttttccaat aattggggaa gtcattcaaa tctataatag  
24601 gtttcagatt tgcttcaata aattctgact gtagctgctg aaacggtgcy gttgaactat  
24661 atttccttat aacttttacg aaagagtttc tttgagtaat cacttctact aagtgcttcc  
24721 gttgctcaa acgataacct ttgacaatat ttaatagctt gaaatgata gacctctgt  
24781 gttgtcttc ctgcctccag ttgcggggc attcaacata aaaaatgata gacccggag  
24841 ttccggaaac gaaatttgca tataccact gctcacgaaa aaaaatgtcc ttgctgatat  
24901 agggatgaat cgcttgggtg acctcatcta ctgcgaaaac ttgaccttc tctccatat  
24961 tgcagtcgcy gcacgatgga actaaattaa taggcatcac cgaaaattca ggataatgtg  
25021 caataggaag aaaatgatct atattttttg tctgtcctat atcaccacaa aatggacatt  
25081 tttcacctga tgaacaagc atgtcatcgt aatatgttct agcggggttg tttttatctc  
25141 ggagattatt ttcataaagc ttttctaatt taacctttgt caggttacca actactaagg  
25201 ttgtaggctc aagaggggtg gtctgtcgt aggtaaataa ctgacctgct gagcttaata  
25261 ttctatattg ttgttctttc tgcaaaaaag tggggaagtg agtaatgaaa ttatttctaa  
25321 catttatctg catcatacct tccgagcatt tattaagcat ttcgctataa gttctcgtg  
25381 gaagaggtag ttttttcatt gtactttacc ttcatctctg ttcattatca tcgcttttaa  
25441 aacggttoga ctttctaate ctatctgacc attataaatt tttagaatgg tttcataaga  
25501 aagctctgaa tcaacggact gcgataataa gtgggtggat ccagaatttg tcaactcaag  
25561 taaaaacacc tcacgagtta aaacacctaa gttctcaccg aatgtctcaa tatccggagc  
25621 gataatattt attgcttctc ttgaccgtag gactttccac atgcaggatt ttggaacctc  
25681 ttgcagtact actggggaat gagttgcaat tattgctaca ccattgcgtg catcgagtaa  
25741 gtcgcttaat gttcgtaaaa aagcagagag caaaggtgga tgcatgaa cctctgggtc  
25801 atcgaataaa actaatgact tttcgccaac gacatctact aatcttgtga tagtaataa  
25861 aacaattgca tgtccagagc tcattcgaag cagatatttc tggatattgt cataaaacaa  
25921 tttagtgaat ttatcatcgt ccacttgaat ctgtggttca ttacgtctta actcttcata  
25981 tttagaaatg aggctgatga gttccatatt tgaaaagttt tcatcactac ttagtttttt  
26041 gatagcttca agccagagtt gtctttttct atctactctc atacaaccaa taaatgctga  
26101 aatgaattct aagcggagat cgcctagtga ttttaacta ttgctggcag cattcttgag  
26161 tccaatataa aagtattgtg taccttttgc tgggtcaggt tgttctttag gaggagtaa  
26221 aggatcaaat gcactaaacg aaactgaaac aagcgcgca aaatatccct ttgggattct  
26281 tgactcgata agtctattat tttcagagaa aaaatattca ttgttttctg ggttgggtgat  
26341 tgcaccaatc attccattca aaattgttgt tttaccacac ccattccgcc cgataaaagc  
26401 atgaatgttc gtgctgggca tagaattaac cgctcactca aaaggtatag ttaaatcact  
26461 gaatccggga gcactttttc tattaatga aaagtggaaa tctgacaatt ctggcaaac  
26521 atttaacaca cgtgcgaact gtccatgaat ttctgaaaga gttaccctc taagtaatga  
26581 ggtgttaagg acgctttc pos26598
